# Supplementary material for: The effect of SGLT2 inhibitor on the gene expression and metabolomic profile of podocytes
Source: Research Square preprint supplement (doi:10.21203/rs.3.rs-8696910/v1), 2026-02-07
Supplement: Supplementary file 1 [file dc4d3daa0190b155e47d2999.docx]

# Table 1. Summary of gene set enrichment analysis (GESA)*

Group A, normal glucose (5 mM); B, high glucose (25 mM); C, high glucose plus dapagliflozin (11 nM). NES, normalized enrichment score; FDR, false discovery rate. The cut-off parameter to show the result is FDR < 0.25.

|  | Group A vs B | | Group C vs B | |
| --- | --- | --- | --- | --- |
| Gene sets | NES | FDR | NES | FDR |
| Carbohydrate metabolism |  |  |  |  |
| Glycolysis / Gluconeogenesis | 1.39 | 0.23 | -1.53 | 0.13 |
| Pyruvate metabolism |  |  | -1.47 | 0.2 |
| Galactose metabolism |  |  | -1.46 | 0.2 |
| Propanoate metabolism |  |  | -1.66 | 0.04 |
| Butanoate metabolism | 1.51 | 0.13 |  |  |
| Lipid metabolism |  |  |  |  |
| Fatty acid degradation | 1.41 | 0.22 |  |  |
| Sphingolipid metabolism |  |  | -1.49 | 0.16 |
| Amino acid metabolism |  |  |  |  |
| Alanine, aspartate and glutamate metabolism | 1.56 | 0.1 |  |  |
| Glycine, serine and threonine metabolism | 1.41 | 0.22 |  |  |
| Valine, leucine and isoleucine degradation | 1.43 | 0.22 | -1.55 | 0.13 |
| Cysteine and methionine metabolism | 1.37 | 0.25 | -1.82 | 0.004 |
| Others |  |  |  |  |
| Pantothenate and CoA biosynthesis | 1.37 | 0.25 |  |  |
| Glutathione metabolism | 1.55 | 0.11 | -1.56 | 0.12 |
| Selenocompound metabolism |  |  | -1.63 | 0.05 |

*Gene sets tested but had no significant change:

- Valine, leucine and isoleucine biosynthesis
- Phenylalanine, tyrosine and tryptophan biosynthesis
- Tryptophan metabolism
- Arginine biosynthesis
- Arginine and proline metabolism
- Histidine metabolism
- Amino sugar and nucleotide sugar metabolism
- Citrate cycle (TCA cycle)
- Pentose phosphate pathway
- Glyoxylate and dicarboxylate metabolism
- Steroid biosynthesis
- beta-Alanine metabolism
- Nicotine addiction
- Regulation of actin cytoskeleton
- Nitrogen metabolism
- Amoebiasis

# Table 2. Results of metabolite set enrichment analysis (MESA)*

Group A, normal glucose (5 mM); B, high glucose (25 mM); C, high glucose plus dapagliflozin (11 nM). FDR, false discovery rate. The cut-off parameter to show the result is FDR < 0.05. Total, number of all metabolites in the pathway; hits, number of altered metabolites in the pathway; p value, comparison result between two groups.

|  | Group A vs B | | | | Group C vs B | | | |
| --- | --- | --- | --- | --- | --- | --- | --- | --- |
| Gene sets | Total | Hits | -log10(p-value) | -log10(FDR) | Total | Hits | -log10(p-value) | -log10(FDR) |
| Carbohydrate metabolism |  |  |  |  |  |  |  |  |
| Citrate cycle (TCA cycle) | 20 | 6 | 5.1 | 3.9 |  |  |  |  |
| Pentose phosphate pathway | 23 | 4 | 2.5 | 1.6 |  |  |  |  |
| Glyoxylate and dicarboxylate metabolism | 31 | 8 | 6.1 | 4.5 | 31 | 4 | 2.3 | 1.3 |
| Butanoate metabolism |  |  |  |  | 15 | 2 | 1.3 | 0.5 |
| Amino acid metabolism |  |  |  |  |  |  |  |  |
| Alanine, aspartate and glutamate metabolism | 28 | 7 | 5.3 | 4 | 28 | 5 | 3.5 | 2.2 |
| Glycine, serine and threonine metabolism | 33 | 6 | 3.7 | 2.6 | 33 | 4 | 2.2 | 1.3 |
| Valine, leucine and isoleucine degradation |  |  |  |  | 39 | 5 | 2.8 | 1.6 |
| Valine, leucine and isoleucine biosynthesis |  |  |  |  | 8 | 5 | 6.6 | 4.6 |
| Arginine biosynthesis | 14 | 7 | 7.7 | 5.8 | 14 | 3 | 2.4 | 1.3 |
| Arginine and proline metabolism | 36 | 8 | 5.6 | 4.1 | 36 | 7 | 5 | 3.4 |
| Histidine metabolism |  |  |  |  | 16 | 3 | 2.3 | 1.3 |
| Others |  |  |  |  |  |  |  |  |
| Glutathione metabolism | 28 | 5 | 3.1 | 2.1 | 28 | 6 | 4.6 | 3.1 |
| beta-Alanine metabolism |  |  |  |  | 21 | 3 | 1.9 | 1.1 |

*Metabolite sets tested but had no significant change:

- Cysteine and methionine metabolism
- Phenylalanine, tyrosine and tryptophan biosynthesis
- Tryptophan metabolism
- Glycolysis / Gluconeogenesis
- Pyruvate metabolism
- Galactose metabolism
- Propanoate metabolism
- Fatty acid degradation
- Sphingolipid metabolism
- Steroid biosynthesis
- Pantothenate and CoA biosynthesis
- Selenocompound metabolism
- Nicotine addiction
- Regulation of actin cytoskeleton
- Nitrogen metabolism
- Amoebiasis

# Table 3. Concentrations of metabolites as measured by capillary electrophoresis time of flight mass spectrometer and capillary electrophoresis-triple quadrupole mass spectrometry (CE-TOF/MS).

Metabolites are grouped according to the metabolic pathways involved. NG, normal glucose (5 mM); HG, high glucose (25 mM); DAPA, dapagliflozin (11 nM). Metabolites were measured in triplicates and concentrations in pmol/10^6 cells. Data are presented as mean ± standard deviation (SD), N.D. (Not Detected): the target peak or metabolite was below detection limits.

|  | NG | HG | NG-DAPA | HG-DAPA |
| --- | --- | --- | --- | --- |
| Glycolysis and gluconeogenesis |  |  |  |  |
| Glucose-6-phosphate | 684.78±134.74 | 1934.11±296.14 | 944.74±354.67 | 1944.75±329.65 |
| Fructose-6-phosphate | 70.15±1.75 | 78.45±86.57 | 50.39±32.57 | 31.12±8.16 |
| Fructose-1,6-bisphosphate | 467.42±82.92 | 3331.87±193.86 | 843.95±338.64 | 4047.06±1011.04 |
| Dihydroxyacetone phosphate | 210.68±163.77 | 1496.06±385.50 | 583.15±393.22 | 2137.22±578.80 |
| Glyceraldehyde-3-phosphate | 95.76±54.36 | 582.35±108.82 | 175.13±83.33 | 713.37±253.48 |
| 2,3-Bisphosphoglycerate | 70.27±26.36 | 66.10±22.84 | 84.30±7.72 | 63.70±20.23 |
| 3-Phosphoglycerate | 377.58±78.48 | 246.41±76.06 | 260.88±50.08 | 261.22±51.34 |
| 2-Phosphoglycerate | 43.62±9.19 | 30.10±11.52 | 32.17±7.05 | 34.33±9.64 |
| Phosphoenolpyruvate | 115.65±23.96 | 40.35±36.51 | 62.42±27.86 | 58.94±28.02 |
| Pyruvate | 1790.93±381.40 | 2072.43±165.71 | 1928.28±524.59 | 2413.61±801.48 |
| Citric acid cycle |  |  |  |  |
| citrate | 113.44±33.39 | 4076.02±3273.90 | 6790.77±319.89 | 6496.65±628.59 |
| isocitrate | 245.25±16.51 | 420.11±7.49 | 459.61±6.13 | 448.20±88.55 |
| α-ketoglutarate | 4368.47±1458.99 | 4249.92±1101.43 | 4679.49±532.85 | 4955.50±652.50 |
| succinate | 297.35±61.60 | 270.40±88.17 | 251.00±34.08 | 330.00±81.06 |
| fumarate | N.D. | 205.91±90.74 | 320.65±107.11 | 274.81±40.31 |
| malate | 2642.23±301.71 | 1582.68±314.08 | 2355.26±74.03 | 2261.31±283.78 |
| Pyruvate metabolism |  |  |  |  |
| Pyruvate | 1790.93±381.40 | 2072.43±165.71 | 1928.28±524.59 | 2413.61±801.48 |
| acetyl-CoA | 1.47±0.10 | 3.18±1.64 | 1.36±0.27 | 3.95±3.36 |
| lactate | 86671.6±17487.1 | 88887.3±9557.1 | 76401.9±5914.8 | 106979.1±20629.4 |
| Pentose phosphate pathway |  |  |  |  |
| Glucose-6-phosphate | 684.78±134.74 | 1934.11±296.14 | 944.74±354.67 | 1944.75±329.65 |
| 6-phosphogluconate | 57.80±2.08 | 195.37±24.97 | 51.55±8.99 | 186.36±20.80 |
| ribulose 5-phosphate | 68.87±10.76 | 153.07±30.81 | 50.60±17.77 | 205.15±83.77 |
| ribose 5-phosphate | 56.19±4.50 | 170.00±52.13 | 64.30±31.19 | 213.01±84.33 |
| xylulose 5-phosphate | N.D. | 123.20±125.48 | N.D. | 107.14±1.96 |
| glyceraldehyde 3-phosphate | 95.76±54.36 | 582.35±108.82 | 175.13±83.33 | 713.37±253.48 |
| sedoheptulose 7-phosphate | N.D. | N.D. | N.D. | N.D. |
| erythrose 4-phosphate | N.D. | N.D. | N.D. | N.D. |
| Fructose-6-phosphate | 70.15±1.75 | 78.45±86.57 | 50.39±32.57 | 31.12±8.16 |
| Galactose metabolism |  |  |  |  |
| galactose-1-phosphate | 56.19±4.50 | 170.00±52.13 | 64.30±31.19 | 213.01±84.33 |
| UDP-glucose | 1406.84±146.63 | 1955.72±151.52 | 1660.61±167.58 | 2049.53±201.39 |
| glucose-1-phosphate | 85.41±2.72 | 161.31±29.11 | 102.12±24.88 | 191.75±39.48 |
| Amino acid |  |  |  |  |
| Arginine | 3328.21±541.41 | 2562.51±341.41 | 2866.26±71.31 | 3132.46±309.54 |
| Proline | 16197.2±4133.0 | 12013.3±1468.8 | 19916.3±1776.2 | 13162.7±1581.2 |
| alanine | 11179.9±2337.2 | 7188.4±320.7 | 12034.7±647.3 | 7992.6±537.3 |
| Aspartate | 5213.3±640.7 | 4460.6±352.7 | 5003.3±275.5 | 4697.28±105.3 |
| Glutamate | 100774.0±12026.6 | 69772.8±2716.9 | 112246.8±6628.4 | 76753.7±2240.3 |
| glycine | 17490.2±1433.0 | 10740.8±220.1 | 20341.7±1963.2 | 11823.1±629.1 |
| serine | 3906.06±128.11 | 3096.33±313.97 | 3743.52±111.30 | 3051.65±385.49 |
| threonine | 2870.57±198.74 | 2284.07±53.89 | 3121.51±170.33 | 2549.40±225.33 |
| valine | 2664.97±378.03 | 2314.57±169.08 | 2491.37±77.02 | 2558.35±106.35 |
| leucine | 4558.10±654.23 | 3888.24±375.47 | 4326.18±181.05 | 4263.86±115.82 |
| isoleucine | 4057.58±579.22 | 3380.05±293.21 | 3697.43±129.51 | 3690.48±107.90 |
| histidine | 1365.55±105,98 | 1166.02±87.18 | 1360.80±32.38 | 1252.18±48.25 |
| phenylalanine | 1479.32±221.38 | 1322.24±140.13 | 1443.55±26.51 | 1383.63±78.44 |
| tyrosine | 1584.33±214.56 | 1372.20±99.39 | 1538.51±44.26 | 1418.87±53.61 |
| tryptophan | 255.23±35.34 | 174.30±8.43 | 228.50±9.78 | 192.37±13.29 |
| Other metabolites |  |  |  |  |
| 2-Oxoglutarate | 4368.47±1458.99 | 4249.92±1101.43 | 4679.49±532.85 | 4955.50±652.50 |
| L-Glutamate | 100774.0±12026.6 | 69772.8±2716.9 | 112246.8±6628.4 | 76753.7±2240.3 |
| N-Acetyl-L-glutamate | 84.99±18.57 | 86.68±19.62 | 94.66±2.88 | 102.21±21.09 |
| L-Glutamine | 2371.59±530.37 | 1189.68±395.79 | 2757.97±1184.51 | 1491.92±403.32 |
| L-Aspartate | 5213.32±640.70 | 4460.58±352.72 | 5003.31±275.48 | 4697.28±105.26 |
| L-Citrulline | 77.88±12.64 | 68.29±26.47 | 86.57±3.16 | 76.66±2.13 |
| N-(L-Aginino)succinate | 103.87±21.03 | 55.74±1.35 | 81.10±7.56 | 65.41±10.63 |
| Fumarate | N.D. | 205.91±90.74 | 320.65±107.11 | 274.81±40.31 |
| L-Arginine | 3328.21±541.41 | 2562.51±341.41 | 2866.26±71.31 | 3132.46±309.54 |
| Urea | 2741.83±515.17 | 5997.05±3052.99 | 4320.85±869.44 | 4972.85±595.96 |
| L-Ornithine | 57.24±11.95 | 281.86±135.46 | 31.00±22.82 | 220.69±66.03 |
